# Supplementary material for: Detecting topological variations of DNA at single-molecule level
Source: PubMed Central journal article supplement (PMC6315031; doi:10.1038/s41467-018-07924-1), 2019-01-02
Supplement: 41467_2018_7924_MOESM3_ESM.pdf [file 41467_2018_7924_MOESM3_ESM.pdf]

**Title:** Supplementary Software

**Description:** Contains all code used in the analysis of the data presented in the manuscript.
